# Supplementary material
Source: PubMed Central journal article supplement (PMC4685850)

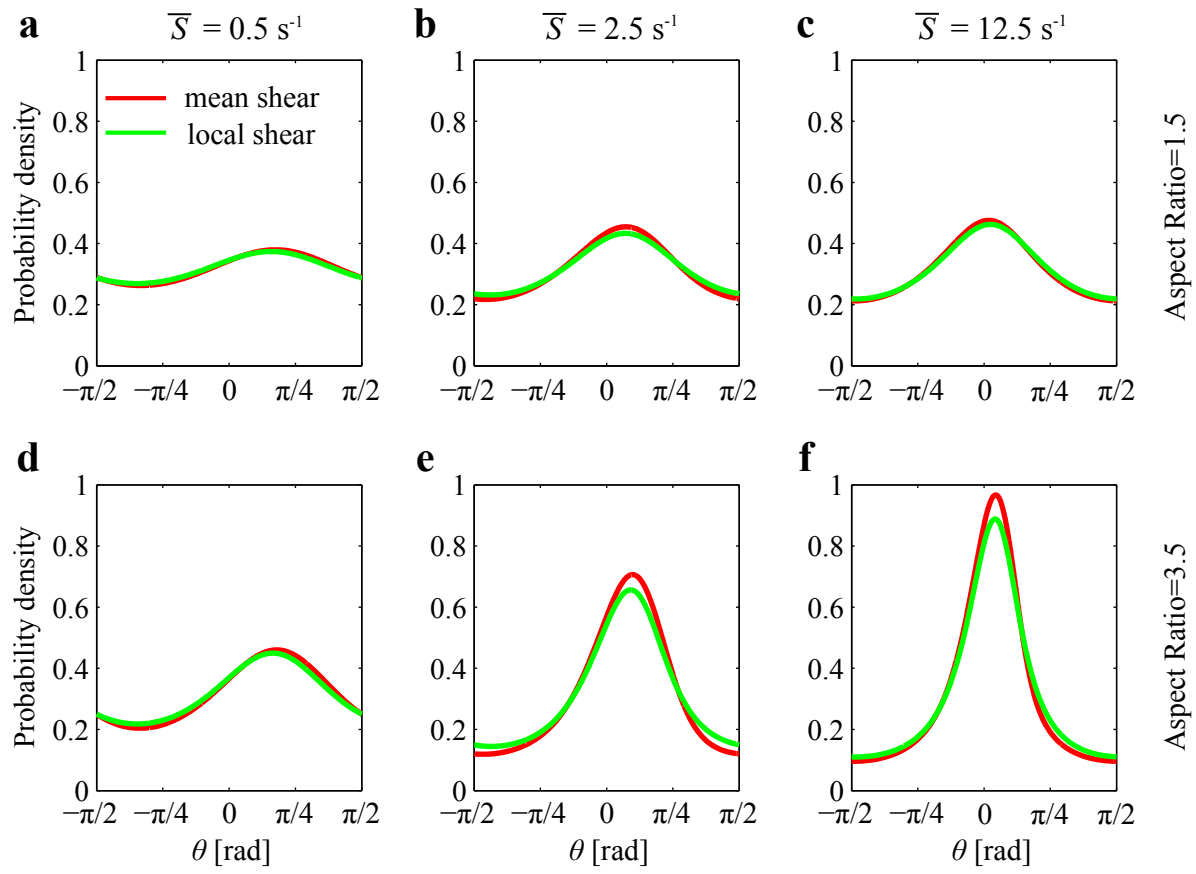

Supplement: rsif20150791supp2.pdf [file rsif20150791supp2.pdf]

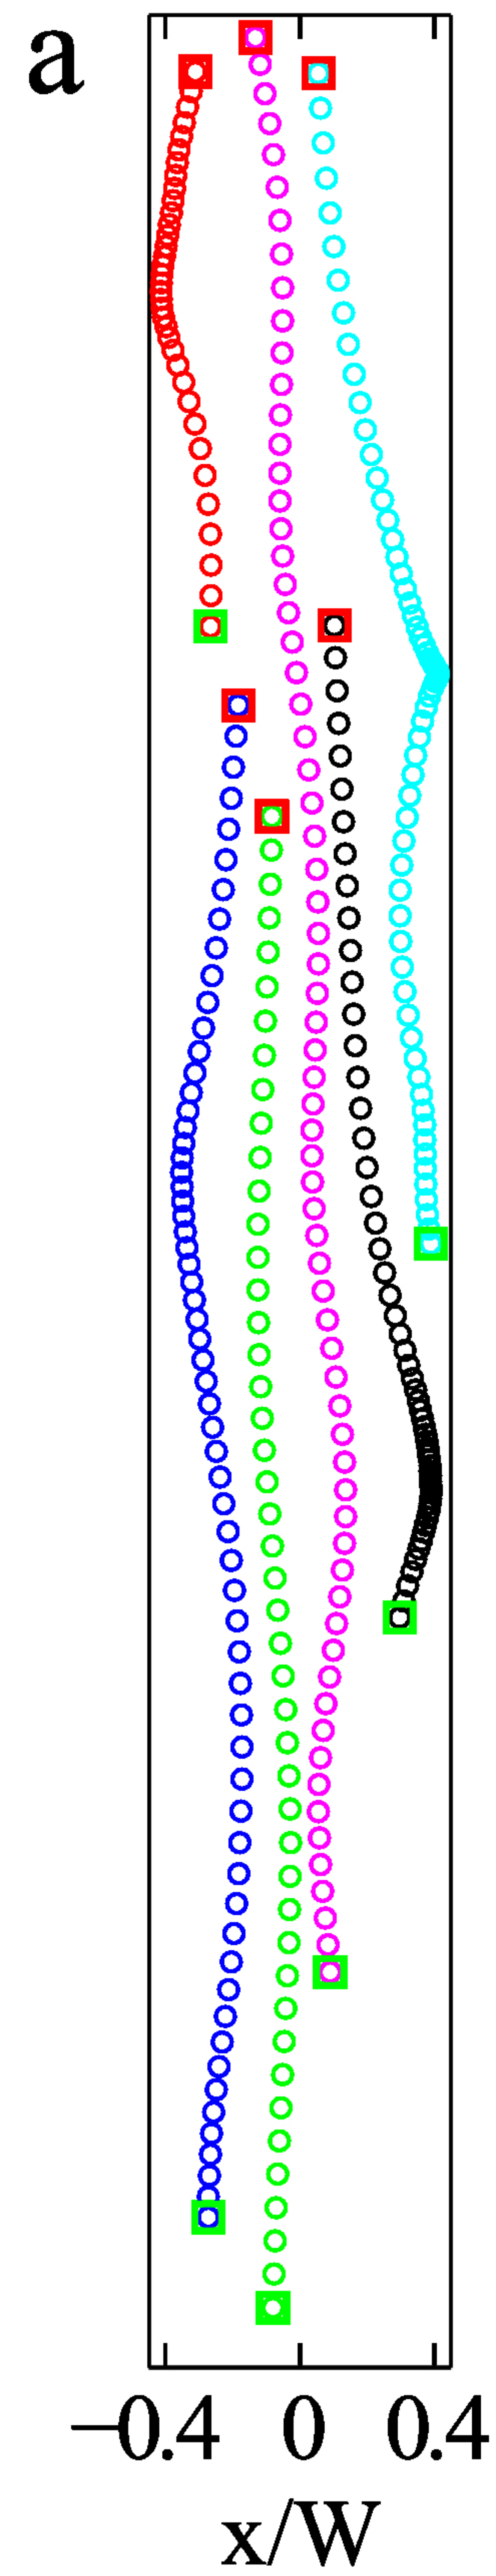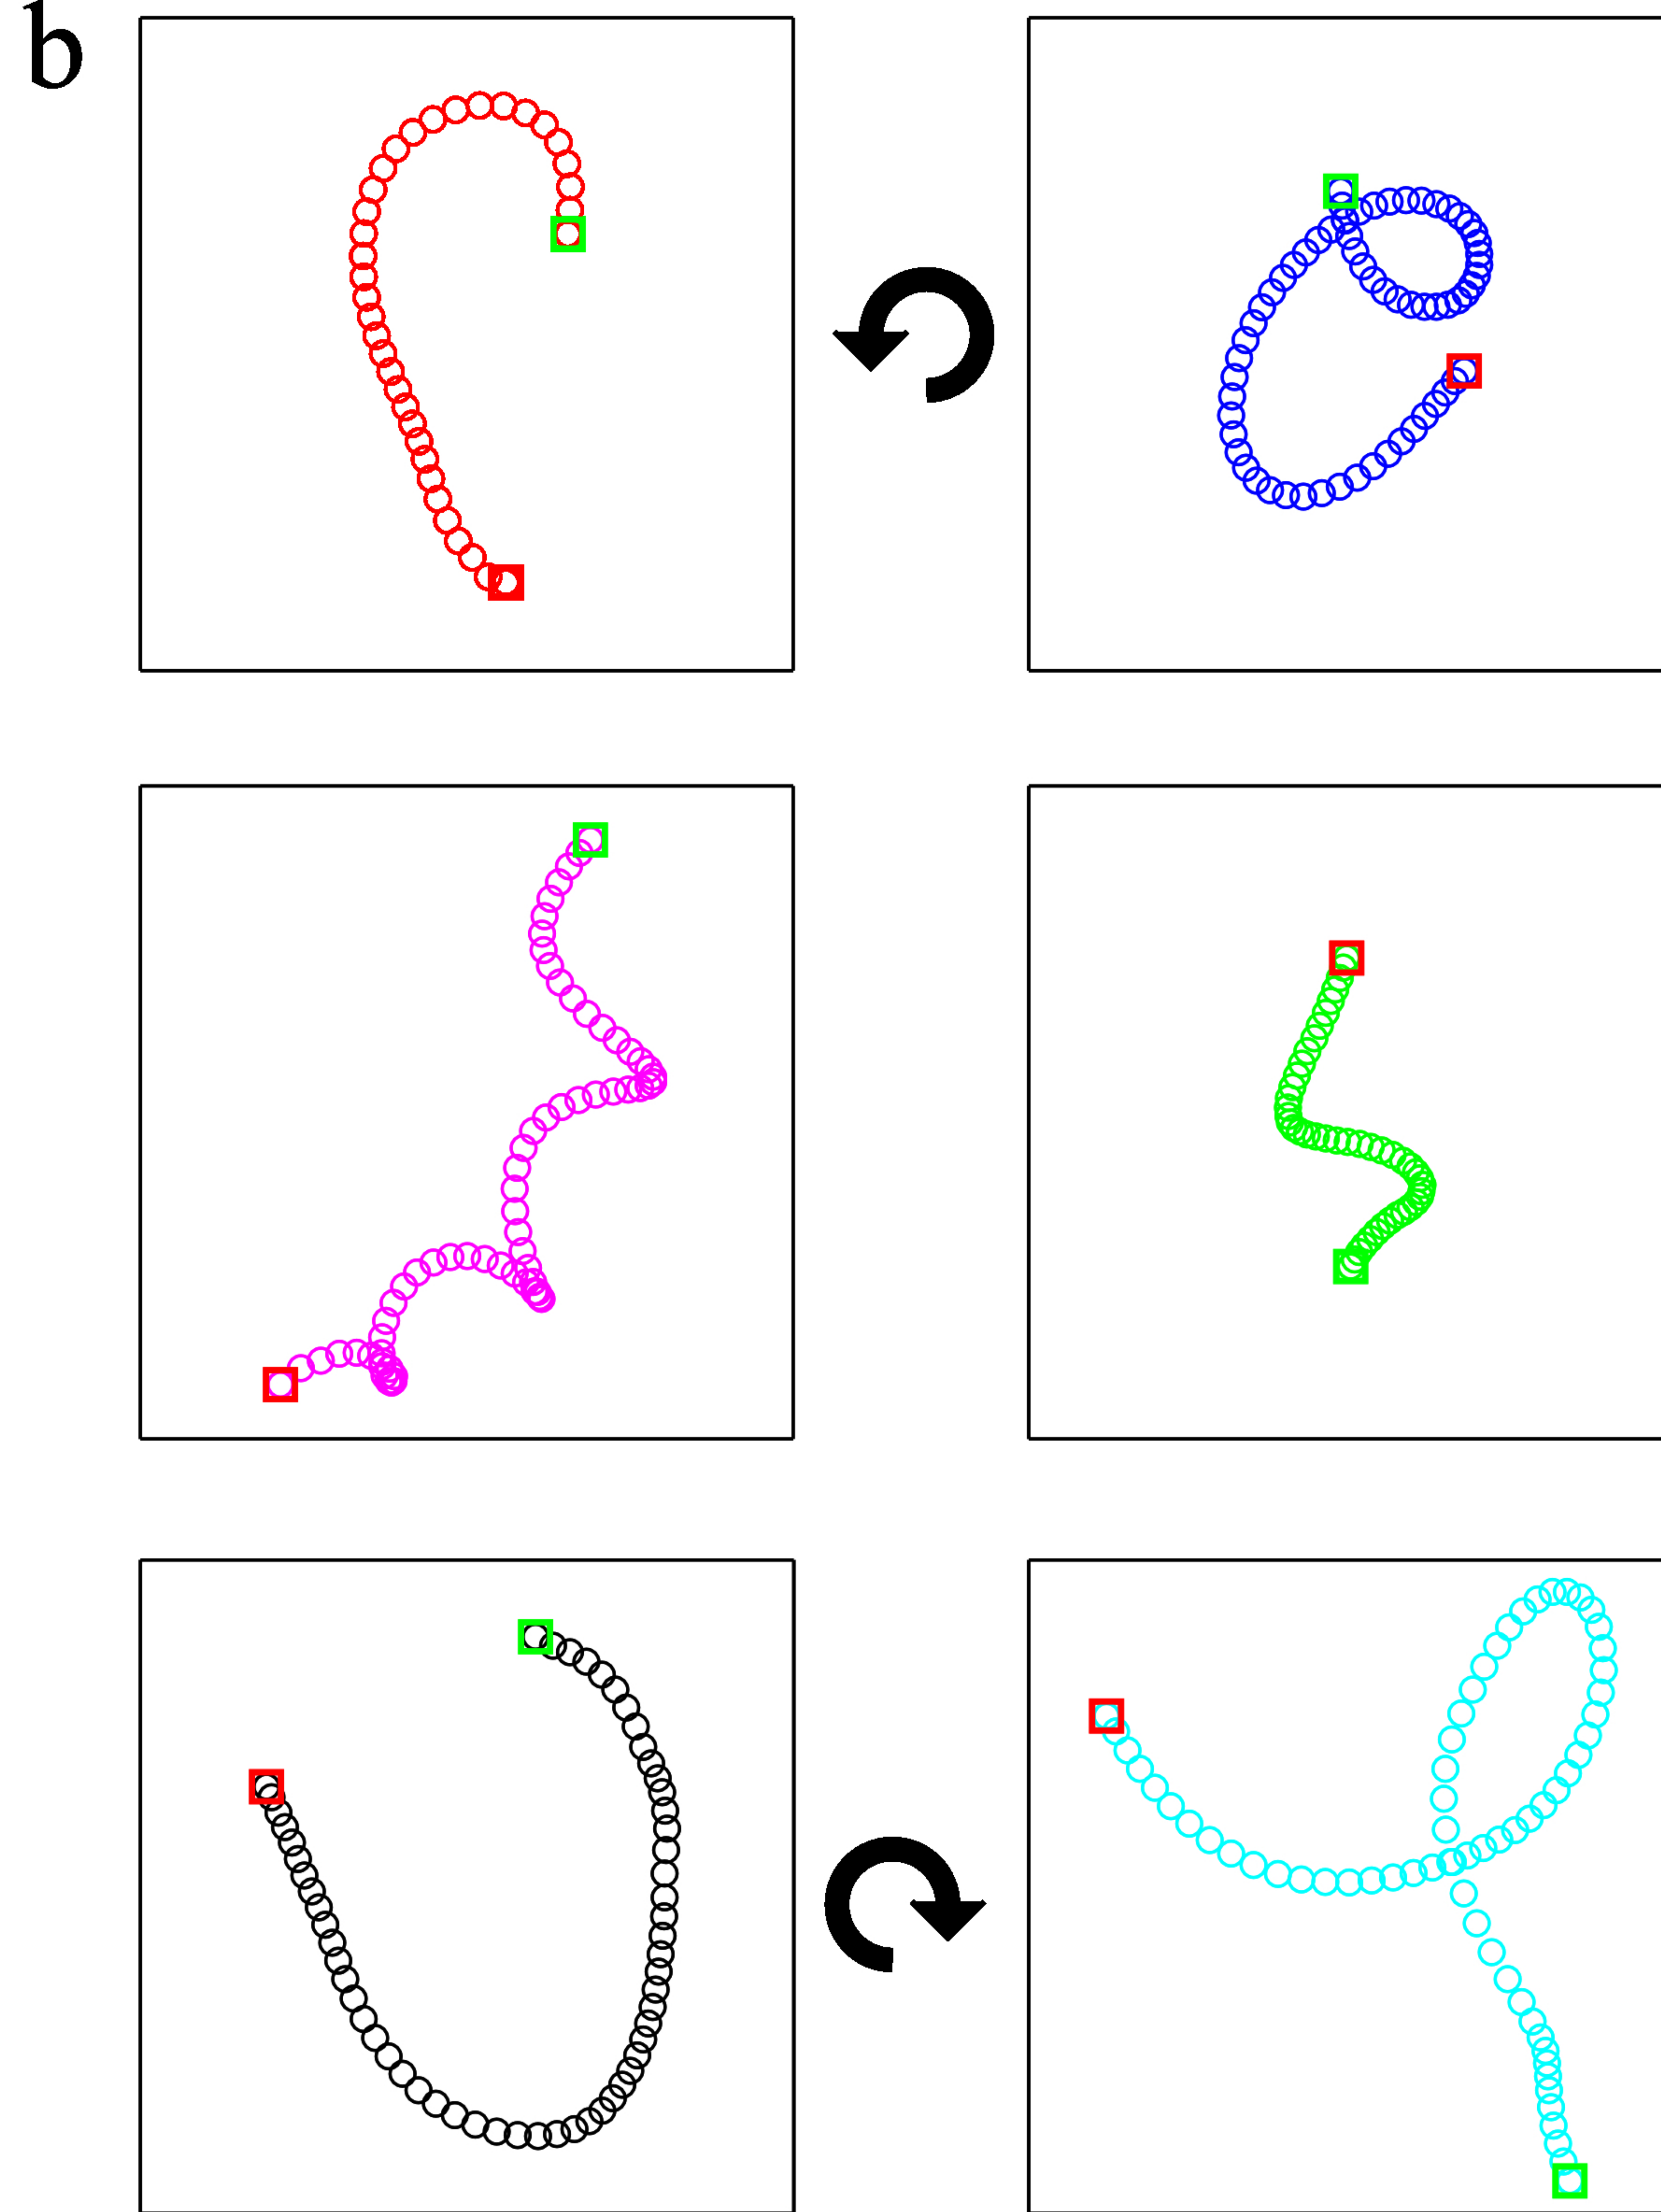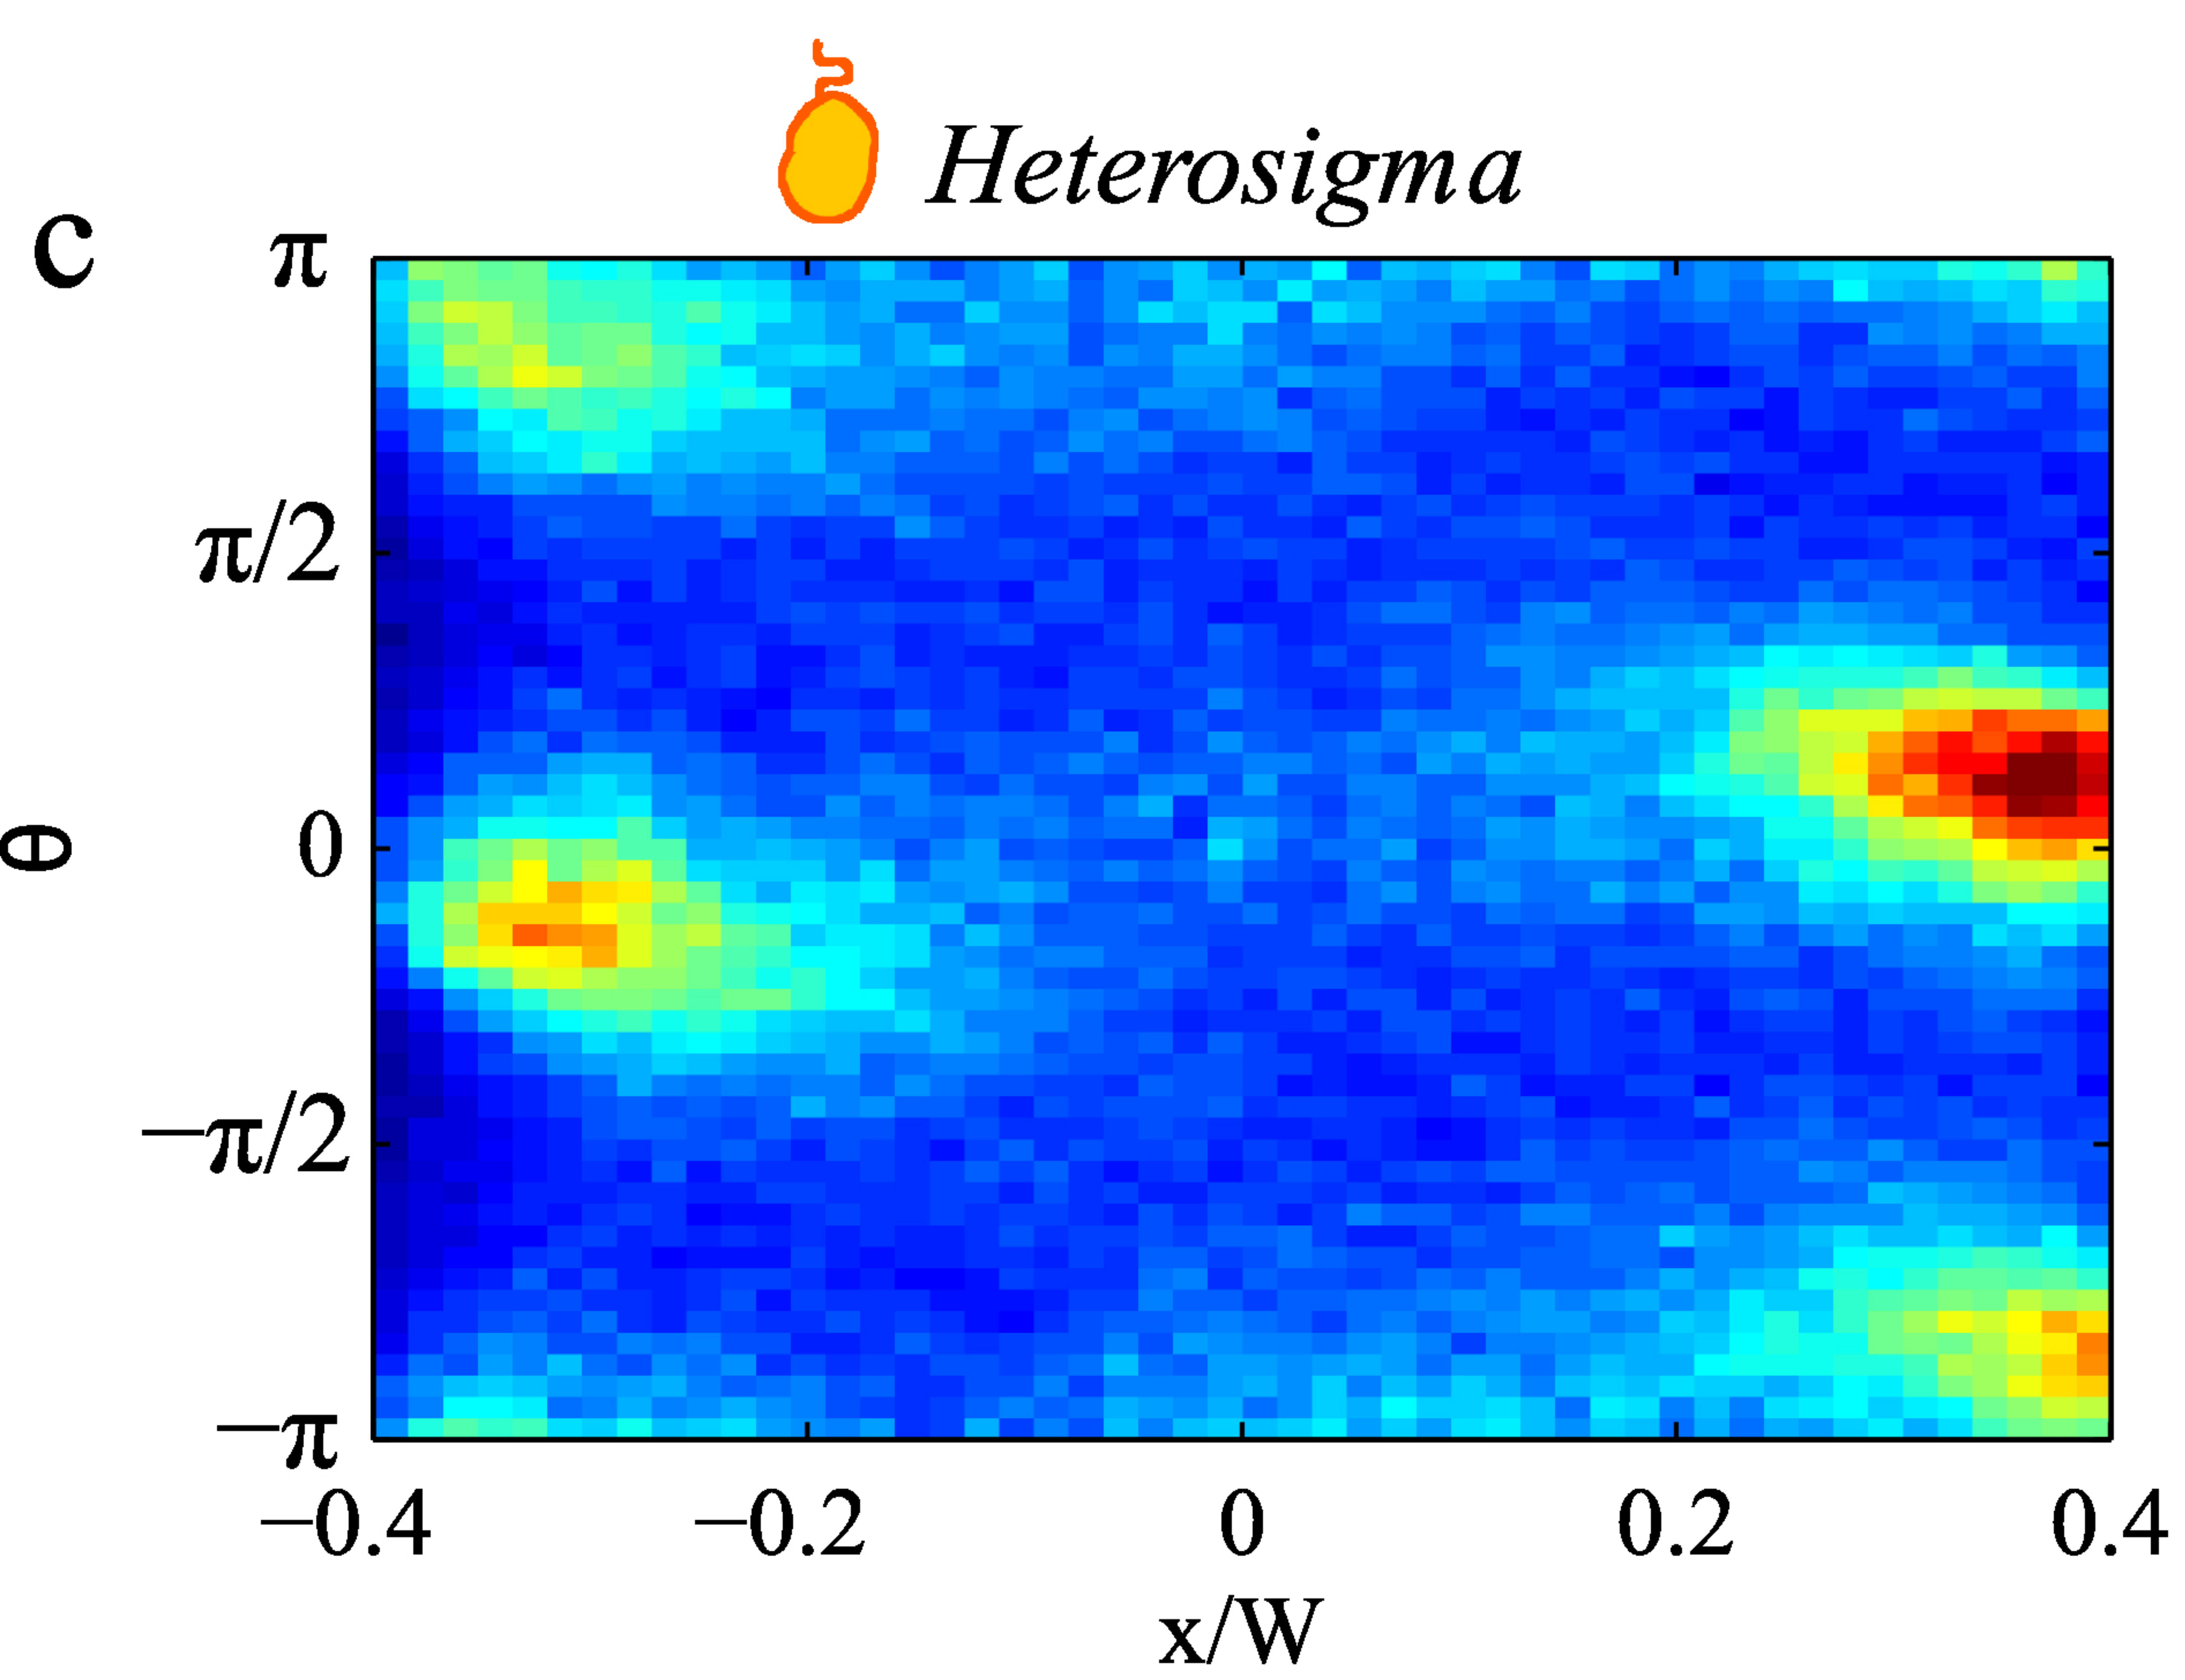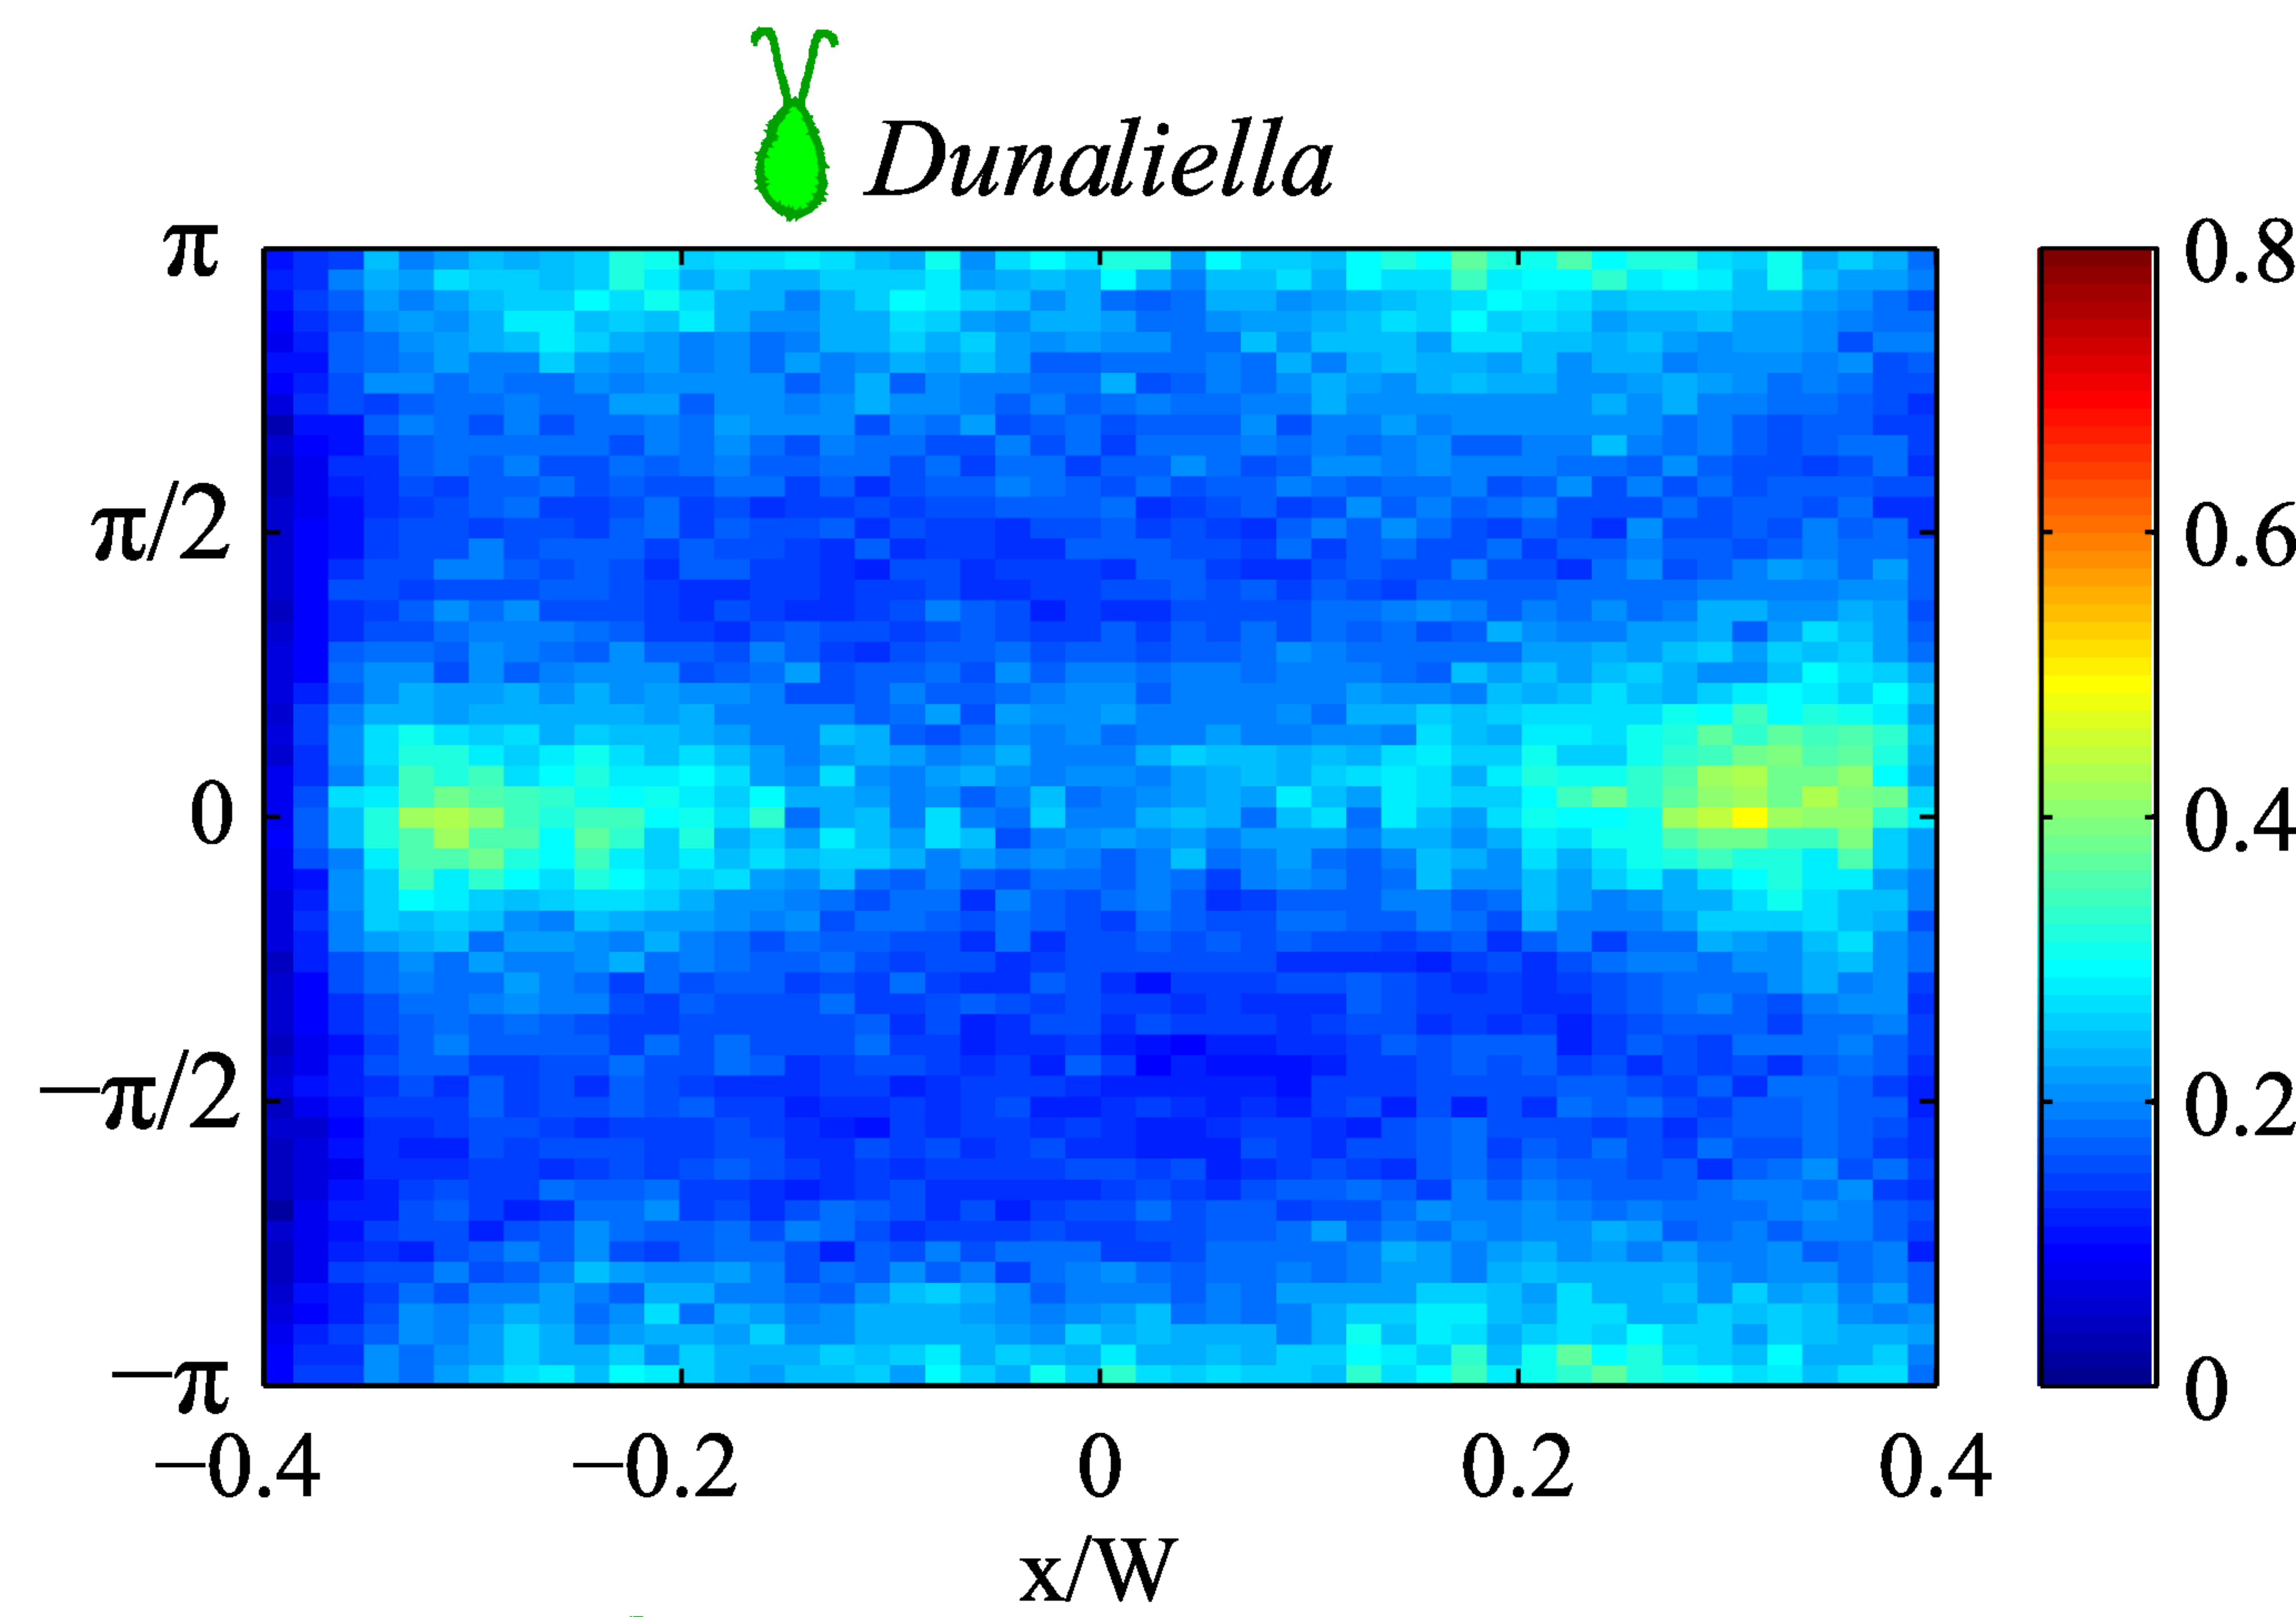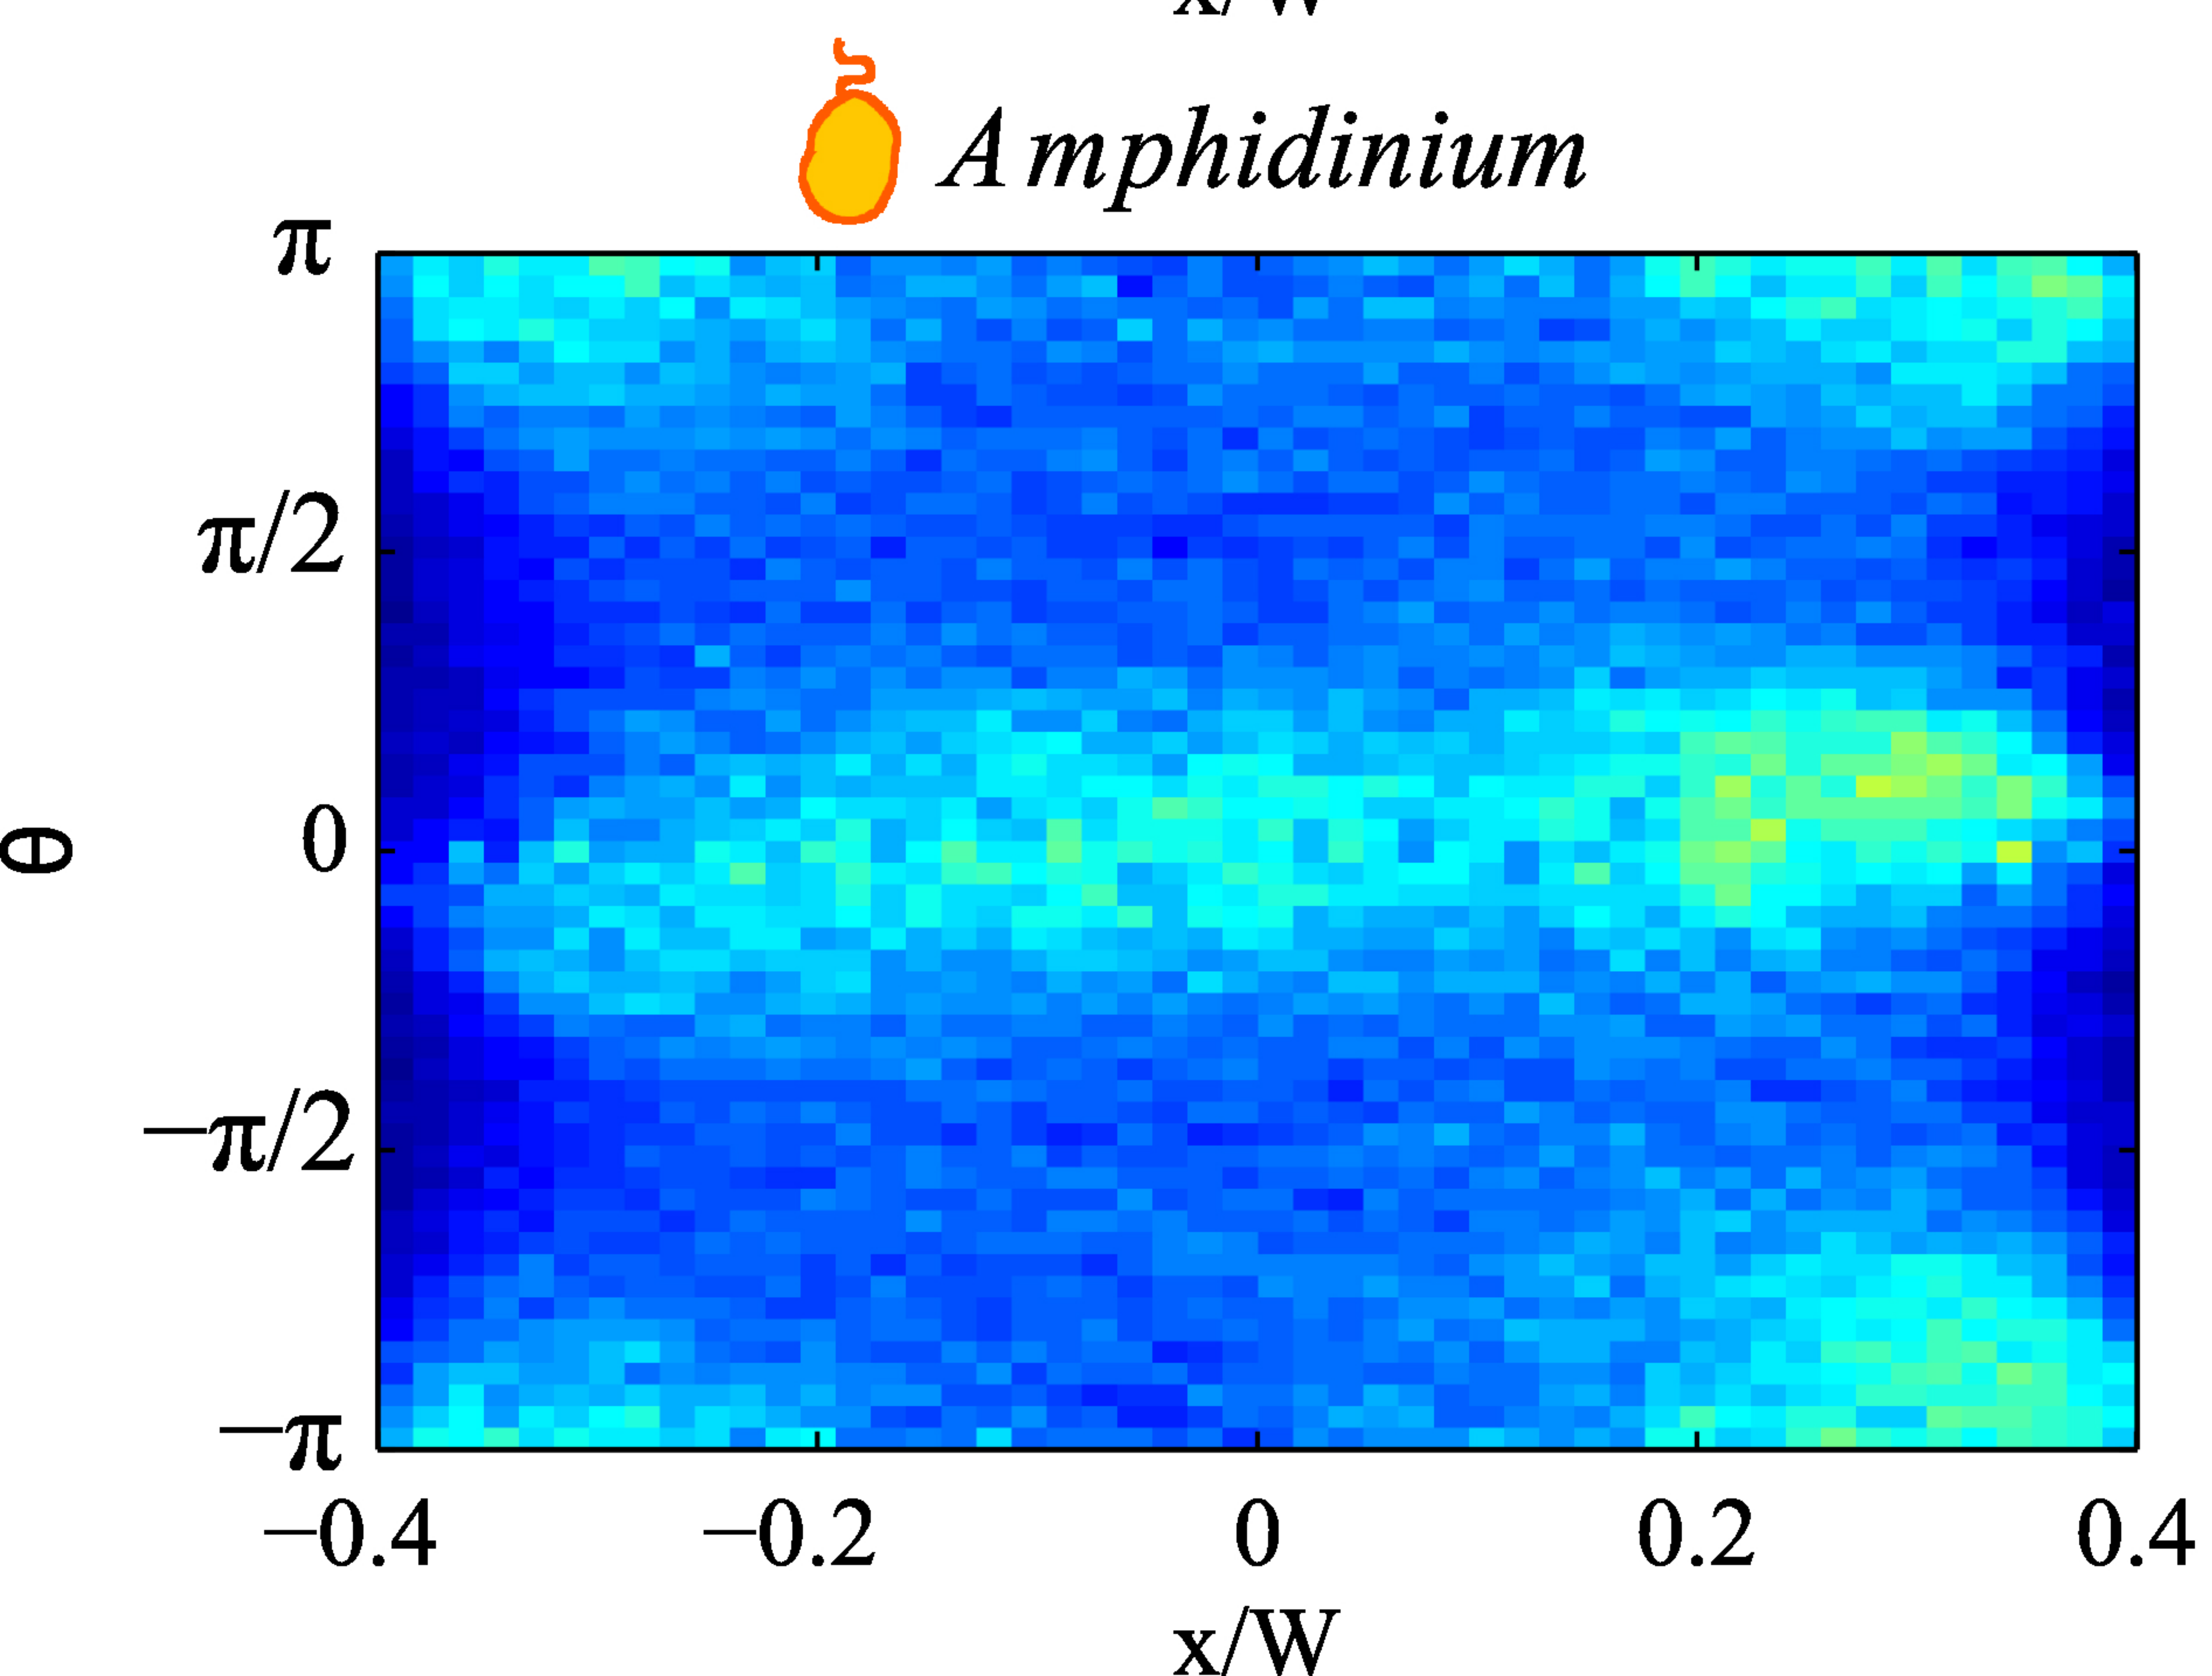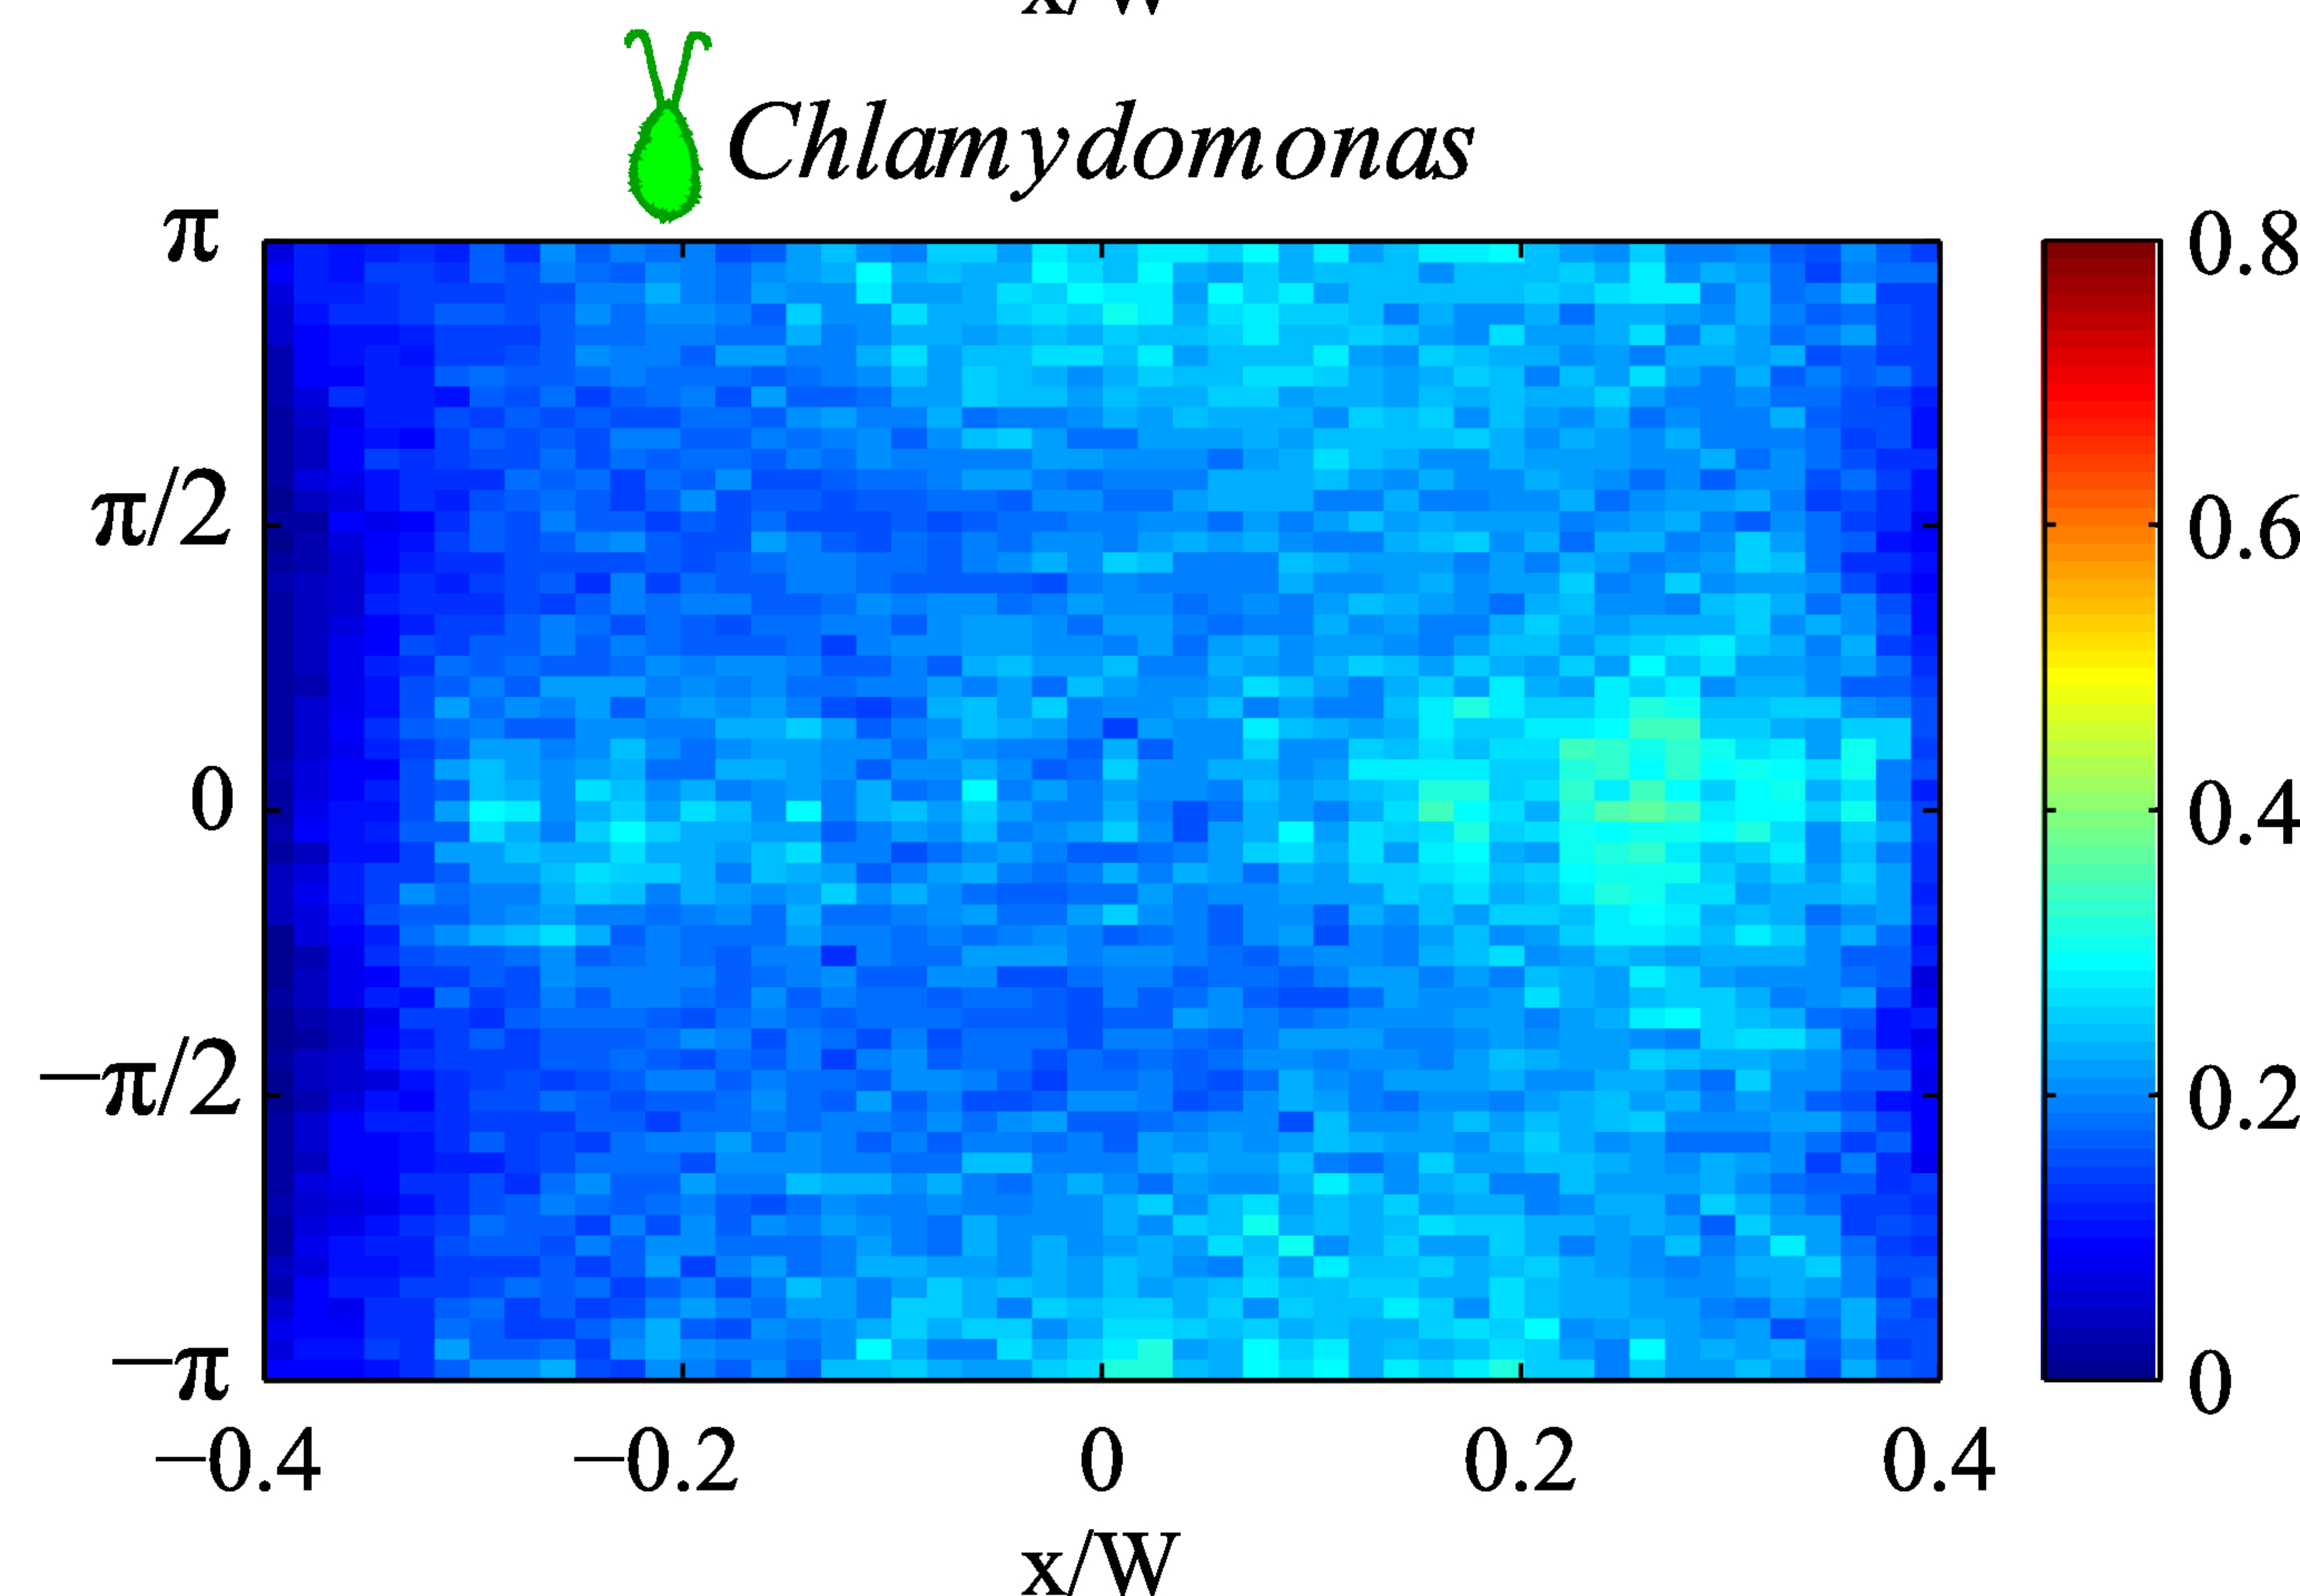

Supplement: rsif20150791supp3.pdf [file rsif20150791supp3.pdf]
